# Supplementary material
Source: Research Square preprint supplement (doi:10.21203/rs.3.rs-9161239/v1)
Supplement: Supplementary file 1 [file bac862f23312619672ee267f.docx]

**Supplement to** **“**Large language models outperform humans at estimating society's everyday norms—but hybrids are even better”

**Contents:** Supplementary Tables 1-5

**Supplementary Table 1.** Detailed performance metrics for all LLMs.

| **Model** | **MAE** | **SD** | **95% CI** | **t** | **df** | **p** |
| --- | --- | --- | --- | --- | --- | --- |
| Gemini 3 Flash | 0.781 | 0.689 | [0.72, 0.84] | -35.32 | 332.0 | < .001 |
| Claude Sonnet 4.5 | 0.853 | 0.861 | [0.78, 0.93] | -33.17 | 321.5 | < .001 |
| GPT-5.2 | 0.995 | 0.896 | [0.92, 1.07] | -27.74 | 330.4 | < .001 |
| LLaMA 3.1 70B | 1.223 | 1.115 | [1.13, 1.32] | -18.74 | 304.9 | < .001 |
| DeepSeek V3 | 1.245 | 0.636 | [1.19, 1.30] | -11.69 | 35.7 | < .001 |
| LLaMA 3.1 8B | 1.615 | 1.066 | [1.53, 1.70] | -4.26 | 80.0 | < .001 |

*Note*. Each LLM was queried 15 times per scenario (n=555 scenarios). MAE and SD reflect single-run (k = 1) mean performance. Statistical tests are two-sample Welch t-tests comparing each LLM's MAE distribution to the distribution of human MAEs (n=320, M=1.77, SD=0.49). All LLMs significantly outperformed the average human at p < .001.

**Supplementary Table 2. 37 scenarios where all six Large Language Models systematically overestimated appropriateness compared to human norms.** The table is sorted by the mean signed error across all models. For each LLM, estimates were aggregated across k=15 runs.

| **Scenario** | **Measured norm** | **Mean signed error** | **GPT** | **Claude** | **Gemini** | **LLaMA 8B** | **LLaMA 70B** | **DeepSeek** |
| --- | --- | --- | --- | --- | --- | --- | --- | --- |
| Jump on a bus | 1.0 | 4.51 | 3.19 | 6.5 | 0.53 | 6.67 | 7.46 | 2.69 |
| Work on a laptop on a downtown sidewalk | 2.13 | 3.17 | 2.95 | 4.49 | 3.84 | 1.5 | 3.47 | 2.8 |
| Sing at a family dinner | 3.31 | 3.03 | 3.18 | 1.94 | 1.3 | 4.26 | 4.48 | 3.02 |
| Write on a date | 2.23 | 2.54 | 2.74 | 0.83 | 0.15 | 2.93 | 4.95 | 3.65 |
| Hold hands at a family dinner | 4.94 | 2.31 | 1.25 | 2.07 | 2.12 | 3.56 | 3.37 | 1.51 |
| Sit on the floor/ground at a football game | 3.58 | 2.12 | 0.35 | 3.67 | 1.42 | 3.78 | 2.36 | 1.14 |
| Jump in an elevator | 1.19 | 2.12 | 0.47 | 1.2 | 0.42 | 1.7 | 7.3 | 1.61 |
| Kiss at the movies | 4.57 | 1.94 | 2.06 | 2.93 | 2.65 | 0.53 | 2.03 | 1.41 |
| Cry in a restroom | 4.74 | 1.89 | 0.42 | 2.35 | 2.49 | 2.27 | 2.41 | 1.39 |
| Run in one’s own room | 5.15 | 1.88 | 3.36 | 2.11 | 1 | 3.06 | 0.28 | 1.5 |
| Chew gum on a date | 3.2 | 1.87 | 2.11 | 2 | 1.64 | 1.89 | 2.74 | 0.83 |
| Work on a laptop in a bar | 3.87 | 1.78 | 2.81 | 1.95 | 1.14 | 1.7 | 1.79 | 1.33 |
| Sing at a football game | 5.91 | 1.74 | 2.34 | 1.59 | 2.11 | 0.91 | 2.49 | 0.98 |
| Sing in a dormitory lounge | 4.3 | 1.72 | 1.17 | 2.75 | 1.47 | 1.1 | 2.85 | 1.01 |
| Argue at a football game | 4.03 | 1.68 | 0.68 | 2.72 | 0.5 | 3.13 | 2.49 | 0.55 |
| Argue on a date | 0.96 | 1.63 | 0.47 | 1.56 | 1.42 | 3.51 | 0.36 | 2.47 |
| Read at a family dinner | 1.9 | 1.51 | 0.05 | 0.32 | 0.19 | 5.89 | 1.01 | 1.59 |
| Belch at a football game | 4.92 | 1.44 | 1.26 | 0.47 | 0.56 | 2.43 | 2.47 | 1.43 |
| Chew gum at a family dinner | 1.92 | 1.43 | 0.37 | 0.63 | 0.83 | 2.62 | 2.39 | 1.76 |
| Argue in the park | 2.71 | 1.42 | 0.75 | 2.79 | 1.04 | 2.42 | 0.58 | 0.92 |
| Run on a bus | 0.6 | 1.39 | 0.21 | 2.25 | 0.76 | 2.33 | 0.58 | 2.23 |
| Work on a laptop on a date | 0.84 | 1.37 | 0.68 | 0.51 | 0.27 | 2.86 | 1.11 | 2.78 |
| Pray audibly in church | 7.27 | 1.33 | 1.37 | 1.48 | 1.3 | 1.27 | 1.27 | 1.28 |
| Write in a bar | 4.96 | 1.3 | 0.42 | 1.76 | 1.77 | 0.85 | 1.86 | 1.14 |
| Wave to a friend at a family dinner | 6.51 | 1.2 | 1 | 0.99 | 0.87 | 1.96 | 2.07 | 0.29 |
| Sing in a bar | 5.98 | 1.13 | 1.79 | 0.72 | 1.31 | 0.48 | 2.23 | 0.25 |
| Chew gum at a job interview | 0.45 | 1.11 | 0.47 | 0.3 | 0.34 | 2.58 | 0.91 | 2.09 |
| Argue at the movies | 0.3 | 1.05 | 0.45 | 0.16 | 0.61 | 3.1 | 0.1 | 1.88 |
| Sing on a bus | 2.2 | 0.96 | 0.27 | 1.05 | 0.21 | 2.42 | 0.65 | 1.18 |
| Sigh at a family dinner | 3.56 | 0.96 | 0.16 | 0.42 | 1.4 | 3.12 | 0.6 | 0.04 |
| Sit on the floor/ground in a bar | 1.57 | 0.89 | 0.09 | 0.94 | 0.28 | 1.9 | 0.11 | 2.01 |
| Play cards at a football game | 1.87 | 0.84 | 0.01 | 0.63 | 0.78 | 0.56 | 1.29 | 1.76 |
| Laugh at the movies | 7.11 | 0.82 | 1.13 | 0.39 | 0.44 | 1.22 | 1.46 | 0.31 |
| Sing in class | 0.97 | 0.78 | 0.61 | 0.33 | 0.53 | 1.49 | 0.27 | 1.46 |
| Fight at the movies | 0.09 | 0.49 | 0.14 | 0.11 | 0.32 | 1.1 | 0.02 | 1.24 |
| Flirt at a job interview | 0.35 | 0.45 | 0.38 | 0.9 | 0.54 | 0.19 | 0.07 | 0.65 |
| Kiss at a job interview | 0.07 | 0.26 | 0.08 | 0.07 | 0.21 | 0.14 | 0.08 | 1 |

**Supplementary Table 3. 59 scenarios where all six Large Language Models systematically *underestimated* appropriateness compared to human norms.** The table is sorted by the mean signed error across all models, from most to least underestimated.

| **Scenario** | **Measured norm** | **Mean signed error** | **GPT** | **Claude** | **Gemini** | **LLaMA 8B** | **LLaMA 70B** | **DeepSeek** |
| --- | --- | --- | --- | --- | --- | --- | --- | --- |
| Blow one's nose on a downtown sidewalk | 6.08 | -3.8 | -4.71 | -2.83 | -0.9 | -6.06 | -4.91 | -3.42 |
| Read in class | 7.89 | -3.57 | -4.61 | -4.94 | -2.9 | -1.06 | -4.13 | -3.76 |
| Talk in a restroom | 5.52 | -3.21 | -3.17 | -2.27 | -2.71 | -4.96 | -3.23 | -2.9 |
| Read in church | 6.43 | -3.16 | -2.23 | -4.88 | -3.53 | -3.09 | -2.11 | -3.12 |
| Laugh at a job interview | 4.62 | -3.06 | -3.94 | -2.88 | -1.64 | -3.96 | -3.52 | -2.42 |
| Work on a laptop in class | 7.58 | -2.96 | -3.64 | -4.26 | -0.03 | -3.62 | -3.49 | -2.73 |
| Belch on a downtown sidewalk | 4.83 | -2.92 | -3.7 | -1.58 | -1.97 | -3.97 | -3.43 | -2.85 |
| Dance in church | 4.2 | -2.58 | -2.81 | -2.92 | -2.45 | -4.1 | -2.25 | -0.93 |
| Spit in the park | 3.95 | -2.45 | -2.73 | -0.7 | -1.93 | -3.75 | -3.67 | -1.9 |
| Fart on a downtown sidewalk | 3.71 | -2.38 | -3.03 | -1.27 | -1.02 | -3.56 | -3.26 | -2.12 |
| Wave to a friend in church | 6.26 | -2.32 | -0.85 | -1.27 | -2.98 | -3.47 | -3.66 | -1.64 |
| Belch in the park | 5.1 | -2.24 | -3.28 | -0.85 | -1.71 | -2.31 | -3.21 | -2.09 |
| Laugh in a restroom | 4.65 | -2.19 | -3.51 | -1.4 | -1.42 | -2.61 | -2.44 | -1.79 |
| Laugh in an elevator | 6.53 | -2.18 | -2.54 | -4.07 | -2.2 | -0.99 | -0.81 | -2.46 |
| Chew gum in an elevator | 7.56 | -2.11 | -4.19 | -1.01 | -0.07 | -2.42 | -1.25 | -3.7 |
| Cry in church | 5.59 | -2.08 | -1.94 | -3.03 | -0.34 | -2.99 | -3.58 | -0.62 |
| Fiddle with one's phone in a bar | 8.05 | -1.96 | -1.9 | -1.31 | -0.46 | -3.12 | -1.1 | -3.87 |
| Fart in the park | 4.69 | -1.95 | -2.6 | -1.37 | -0.79 | -3.0 | -3.07 | -0.83 |
| Write in church | 4.52 | -1.93 | -3.26 | -3.02 | -0.13 | -2.95 | -1.44 | -0.78 |
| Talk in church | 3.87 | -1.92 | -2.42 | -2.37 | -2.12 | -1.53 | -2.05 | -1.05 |
| Mumble in church | 3.53 | -1.91 | -2.44 | -2.23 | -1.69 | -1.97 | -2.03 | -1.08 |
| Laugh in church | 3.48 | -1.86 | -2.39 | -2.18 | -1.73 | -2.66 | -1.56 | -0.67 |
| Talk on the phone in a restroom | 3.22 | -1.85 | -2.22 | -1.04 | -1.47 | -3.09 | -2.41 | -0.88 |
| Eat in an elevator | 3.34 | -1.85 | -1.92 | -0.84 | -1.68 | -3.28 | -2.97 | -0.4 |
| Chew gum in church | 3.25 | -1.61 | -2.18 | -1.95 | -1.14 | -2.0 | -1.48 | -0.91 |
| Shout in church | 2.0 | -1.59 | -1.67 | -1.85 | -1.46 | -1.99 | -1.84 | -0.75 |
| Jump in church | 2.41 | -1.57 | -1.86 | -1.94 | -1.03 | -2.39 | -2.06 | -0.12 |
| Pray audibly in a restroom | 2.77 | -1.55 | -1.68 | -1.67 | -1.1 | -2.35 | -2.23 | -0.26 |
| Spit on a downtown sidewalk | 2.34 | -1.49 | -1.89 | -0.14 | -1.27 | -2.34 | -2.02 | -1.26 |
| Curse at a family dinner | 2.26 | -1.48 | -1.71 | -2.01 | -0.61 | -1.63 | -1.87 | -1.03 |
| Mumble on a downtown sidewalk | 5.66 | -1.31 | -2.98 | -0.61 | -0.18 | -1.99 | -0.95 | -1.12 |
| Hold hands in a restroom | 1.76 | -1.27 | -1.42 | -1.49 | -0.7 | -1.75 | -1.66 | -0.61 |
| Mumble in class | 3.53 | -1.26 | -2.21 | -1.03 | -1.3 | -0.27 | -2.09 | -0.65 |
| Belch in an elevator | 1.95 | -1.25 | -1.53 | -1.75 | -0.81 | -1.27 | -1.53 | -0.6 |
| Curse in the park | 3.83 | -1.24 | -1.57 | -0.58 | -0.55 | -1.56 | -2.32 | -0.86 |
| Sit on the floor/ground in church | 2.72 | -1.23 | -1.57 | -1.44 | -1.18 | -1.96 | -0.78 | -0.46 |
| Argue in a restroom | 2.03 | -1.21 | -1.61 | -0.58 | -0.46 | -2.02 | -1.72 | -0.9 |
| Talk on a bus | 7.52 | -1.19 | -2.58 | -0.02 | -0.34 | -1.09 | -1.26 | -1.86 |
| Cry at a football game | 4.32 | -1.17 | -2.14 | -1.07 | -0.45 | -0.83 | -2.39 | -0.15 |
| Sigh in church | 3.92 | -1.17 | -1.76 | -1.42 | -0.68 | -0.32 | -2.15 | -0.67 |
| Cry on a downtown sidewalk | 4.21 | -1.15 | -2.15 | -0.96 | -0.63 | -0.3 | -2.31 | -0.59 |
| Eat in a bar | 8.23 | -1.11 | -1.18 | -1.39 | -0.13 | -1.49 | -0.77 | -1.69 |
| Listen to music on headphones in a dormitory lounge | 8.44 | -1.01 | -0.81 | -0.94 | -0.0 | -1.92 | -0.39 | -2.02 |
| Belch in church | 1.39 | -1.01 | -1.23 | -1.31 | -0.69 | -1.38 | -1.15 | -0.31 |
| Wave to a friend in a bar | 8.76 | -0.98 | -0.64 | -0.26 | -0.05 | -3.37 | -0.23 | -1.36 |
| Belch on a bus | 2.15 | -0.94 | -1.69 | -0.85 | -0.44 | -0.58 | -1.48 | -0.57 |
| Eat in a restroom | 1.29 | -0.92 | -1.08 | -0.92 | -0.69 | -1.28 | -1.19 | -0.38 |
| Hold hands at the movies | 8.55 | -0.91 | -0.9 | -0.33 | -0.16 | -1.68 | -0.69 | -1.7 |
| Flirt in an elevator | 3.3 | -0.79 | -1.63 | -0.8 | -0.54 | -0.24 | -1.54 | -0.03 |
| Flirt in a restroom | 1.4 | -0.77 | -0.36 | -0.74 | -0.48 | -1.4 | -1.26 | -0.38 |
| Fart in church | 1.09 | -0.71 | -0.83 | -1.04 | -0.36 | -1.07 | -0.89 | -0.09 |
| Sit on the floor/ground on a downtown sidewalk | 2.92 | -0.69 | -0.97 | -0.37 | -0.31 | -1.06 | -0.92 | -0.52 |
| Talk in a bar | 8.78 | -0.68 | -0.54 | -0.28 | -0.02 | -1.78 | -0.25 | -1.2 |
| Fight in a bar | 1.5 | -0.67 | -1.16 | -0.22 | -0.4 | -1.11 | -1.11 | -0.01 |
| Play cards in one’s own room | 8.64 | -0.51 | -0.11 | -0.14 | -0.42 | -0.83 | -0.13 | -1.39 |
| Read in one’s own room | 8.96 | -0.41 | -0.27 | -0.21 | -0.01 | -0.49 | -0.37 | -1.09 |
| Spit at a family dinner | 0.55 | -0.39 | -0.41 | -0.48 | -0.27 | -0.55 | -0.5 | -0.12 |
| Spit on a date | 0.5 | -0.31 | -0.37 | -0.45 | -0.05 | -0.5 | -0.49 | -0.03 |
| Fight in class | 0.41 | -0.24 | -0.24 | -0.29 | -0.09 | -0.4 | -0.38 | -0.07 |

**Supplementary Table 4.** Within-model correlations of signed errors across k=15 runs for each LLM. Each model has 105 unique run pairs (15 choose 2), all computed over 555 scenarios.

| **Model** | **Mean r** | **SD** |
| --- | --- | --- |
| Claude Sonnet 4.5 | 0.978 | 0.005 |
| GPT-5.2 | 0.863 | 0.018 |
| LLaMA 3.1 70B | 0.843 | 0.027 |
| LLaMA 3.1 8B | 0.774 | 0.042 |
| Gemini 3 Flash | 0.766 | 0.185 |
| DeepSeek V3 | 0.729 | 0.131 |

**Supplementary Table 5.** Performance of aggregates of several LLMs (each aggregated across k=15 runs) compared to the best individual model.

| **Aggregate** | **Models included** | **MAE** | **95% CI** | **Δ MAE vs. Gemini** | **t** | **df** | **p** |
| --- | --- | --- | --- | --- | --- | --- | --- |
| Best 2 LLMs | Gemini 3 Flash, Claude Sonnet 4.5 | 0.68 | [0.63, 0.74] | −0.03 | −0.74 | 1108.0 | .459 |
| Best 3 LLMs | + GPT-5.2 | 0.65 | [0.60, 0.71] | −0.06 | −1.50 | 1106.0 | .133 |
| Best 4 LLMs | + DeepSeek V3 | 0.65 | [0.60, 0.70] | −0.06 | −1.62 | 1095.9 | .106 |
| Best 5 LLMs | + LLaMA 3.1 70B | 0.68 | [0.63, 0.74] | −0.03 | −0.75 | 1107.2 | .452 |
| All 6 LLMs | + LLaMA 3.1 8B | 0.73 | [0.68, 0.79] | +0.02 | 0.43 | 1107.5 | .666 |

*Note*. Gemini 3 Flash MAE = 0.71 (95% CI [0.66, 0.77]). Δ MAE = difference from Gemini 3 Flash (negative values indicate improvement). Statistical tests are Welch t-tests comparing scenario-level absolute errors (n=555 scenarios per group). No aggregate achieved significantly better performance than the best individual model (all p > .10). Models are ordered by individual performance, with aggregates progressively adding the next-best-performing model.
